# Supplementary material for: Inducible super-enhancers are organized based on canonical signal-specific transcription factor binding elements
Source: PubMed Central journal article supplement — Nucleic Acids Res. 2016 Dec 19;45(7):3693–706. doi: 10.1093/nar/gkw1283 (PMC5397169; doi:10.1093/nar/gkw1283), 2016-12-19
Supplement: gkw1283_Supp.pdf [file gkw1283_Supp.pdf]

# Supplemental information

## Inducible super-enhancers are organized by canonical signal-specific transcription factor binding elements

Dóra Bojcsuk, Gergely Nagy and Balint L. Balint

### SUPPLEMENTARY FIGURES (page 2-11)

**Figure S1.** Comparison of ER $\alpha$  ChIP-seq binding sites upon E2 treatment

**Figure S2.** Appearing daughter enhancers are recruited nearby to mother enhancers upon treatment

**Figure S3.** Mother enhancers show larger tag density before treatment than the daughter enhancers upon treatment

**Figure S4.** SE formation depends on nucleating (mother) enhancers and the presence of FoxA1

**Figure S5.** Canonical elements provide higher DNA-binding affinity than non-canonical elements

**Figure S6.** Recruitment of ER $\alpha$ , FoxA1 and AP2 $\gamma$  at each other's SEs

**Figure S7.** FoxA1 and AP2 $\gamma$  super-enhancers show active but not inducible presence of active marks and co-factors upon E2 treatment

### SUPPLEMENTARY TABLES (page 12-14)

**Table S1.** Table of used transcription factor ChIP-seq samples

**Table S2.** Estradiol-treated (E2) ER $\alpha$  ChIP-seq samples used for the comparative analysis

**Table S3.** Table of used ChIP-seq samples to characterize super-enhancers

### SUPPLEMENTAL REFERENCES (page 15-16)

**Figure S1.**

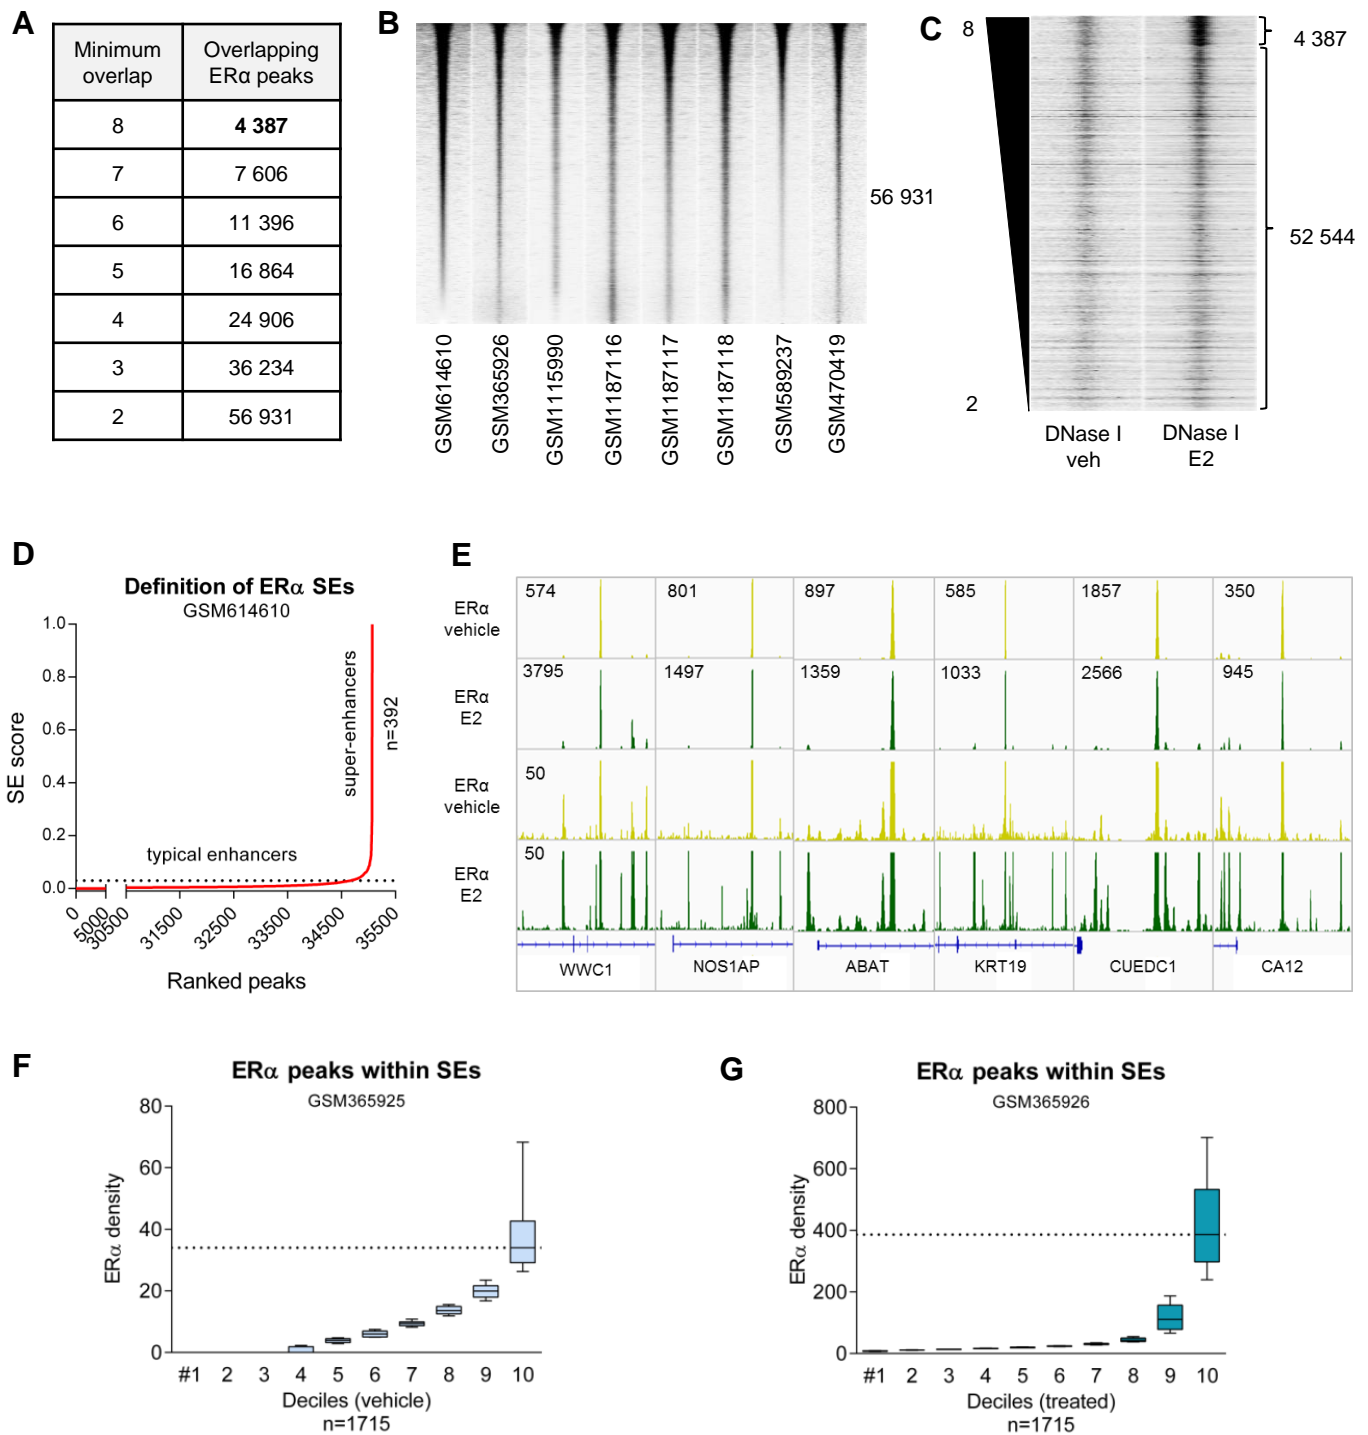

**Figure S1. Comparison of ER $\alpha$  ChIP-seq binding sites upon E2 treatment.**

(A) Number of the common ER $\alpha$  peaks between eight different ChIP-seq samples after various overlapping criteria.

(B) Read distribution plot represents the 56,931 ER $\alpha$  peaks which could be predicted from at least two samples. Peaks were sorted by the calculated RPKM values of GSM614610 experiment.

(C) Read distribution plot demonstrates the signal intensity of DNase I hypersensitivity at the sites of the 56,931 ER $\alpha$  peaks sorted by the amount of overlap between the eight experiments (from 8 to 2 samples). Reads were calculated from GSM614610 experiment.

(D) Definition of ER $\alpha$  SEs. Enhancers with a slope greater than 1 are considered as SEs.

(E) IGV snapshot of ER $\alpha$  ChIP-seq coverage representing six ER $\alpha$  SEs upon vehicle (veh) and estradiol (E2) treatments. The interval scales are autoscale in the first two tracks and 50 in the last two tracks.

(F-G) ER $\alpha$  densities upon vehicle or E2 treatment in the deciles defined by ER $\alpha$  recruitment at those SE regions showing read enrichment.

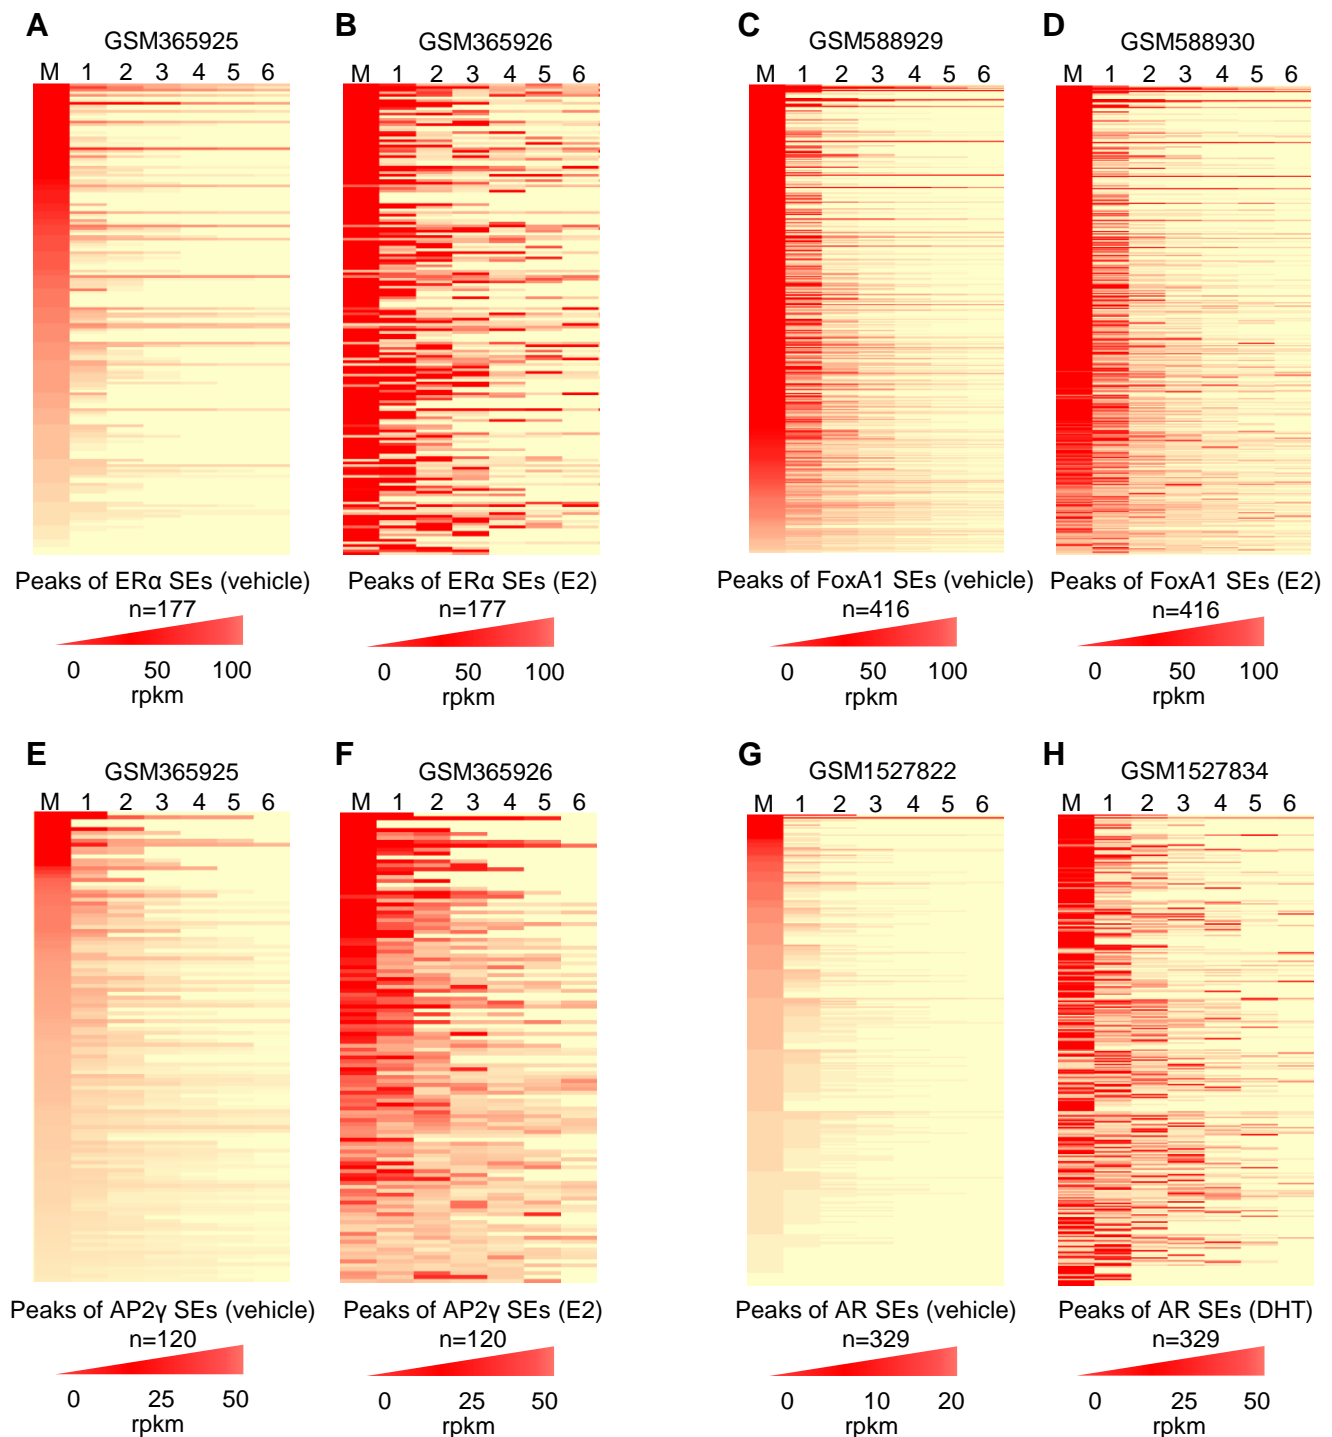

**Figure S2. Appearing daughter enhancers are recruited nearby to mother enhancers upon treatment.**

**(A-B)** ER $\alpha$  tag densities of mother (M) and the top 6 daughter enhancers (1-6) forming super-enhancers in vehicle (veh) and estradiol (E2) treated MCF-7 cells.

**(C-D)** FoxA1 tag densities of mother (M) and the top 6 daughter enhancers (1-6) forming super-enhancers in vehicle (veh) and E2 treated MCF-7 cells.

**(E-F)** AP2 $\gamma$  tag densities of mother (M) and the top 6 daughter enhancers (1-6) forming super-enhancers in vehicle (veh) and E2 treated MCF-7 cells.

**(G-H)** AR tag densities of mother (M) and the top 6 daughter enhancers (1-6) forming super-enhancers in vehicle (veh) and dihydrotestosterone (DHT) treated LNCaP cells.

Enhancers were vertically sorted based on the RPKM values of the mother enhancers (in the first row), and the individual enhancers within a SE region were subsequently horizontally aligned based on read enrichment in the vehicle-treated samples.

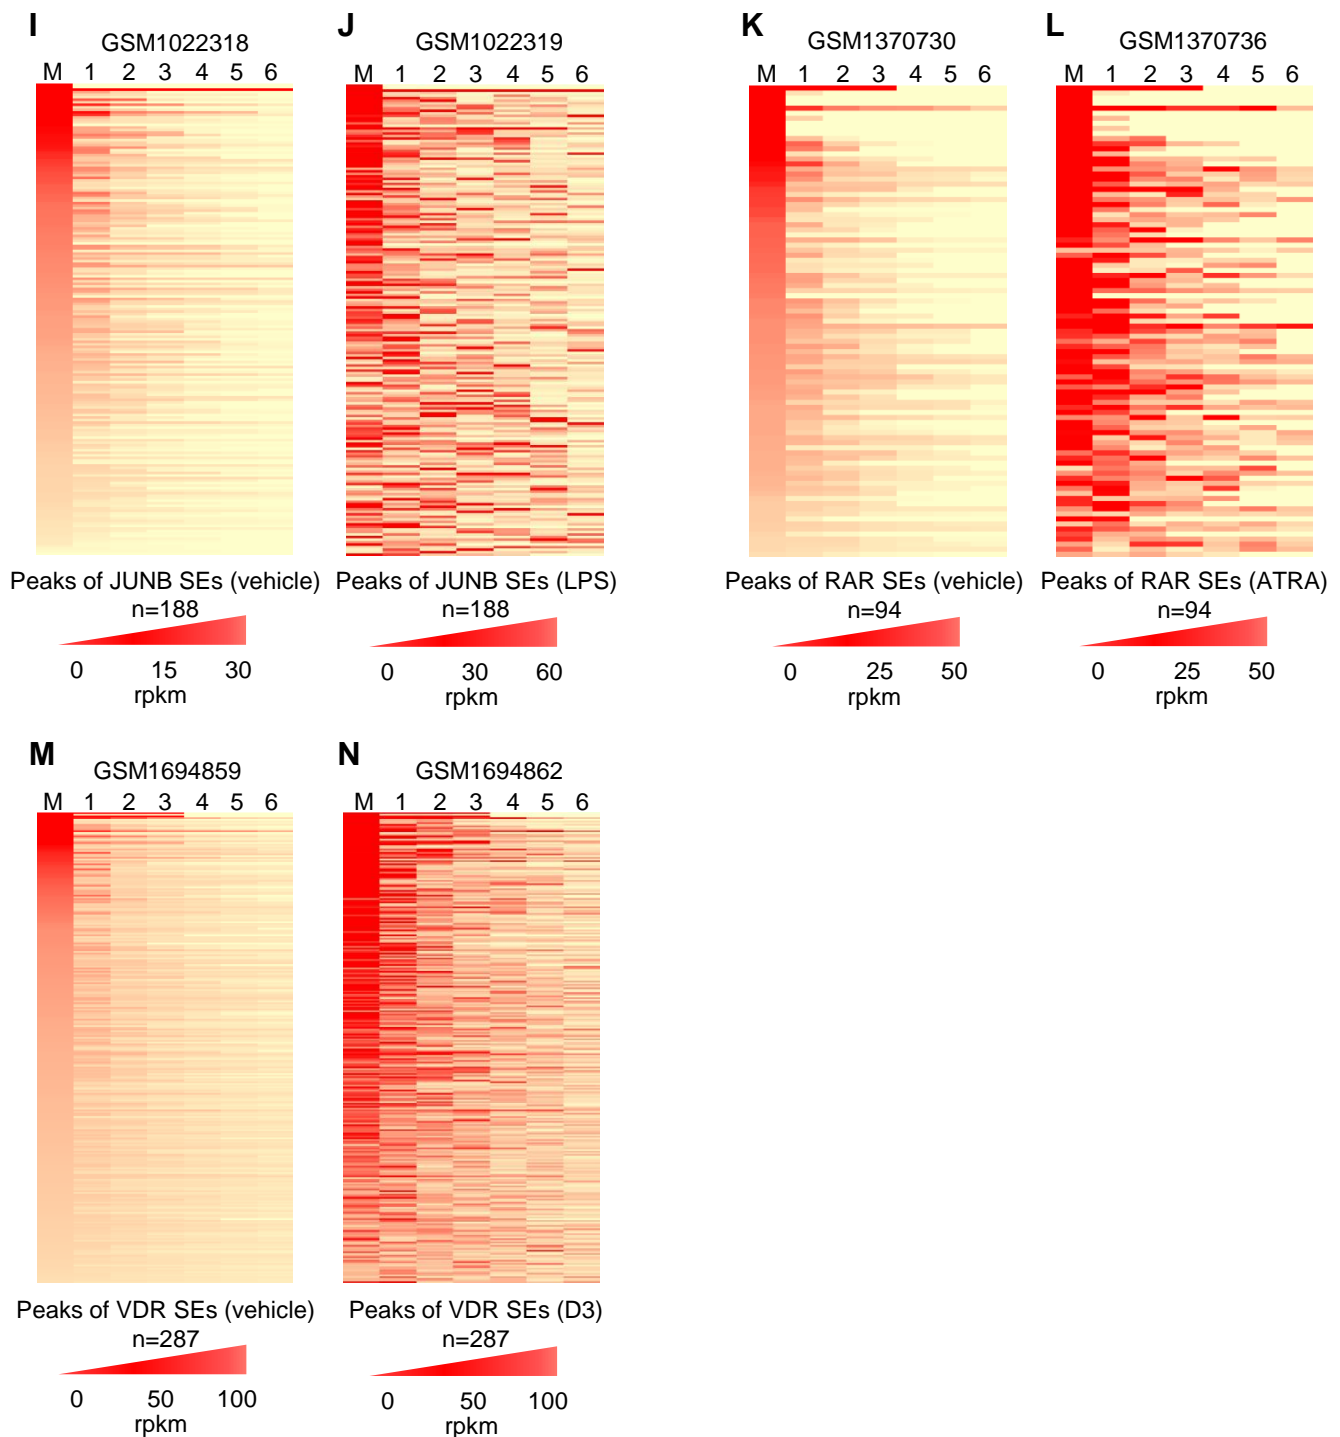

**Figure S2. Appearing daughter enhancers are recruited nearby to mother enhancers upon treatment.**

**(I-J)** JUNB (AP-1) tag densities of mother (M) and the top 6 daughter enhancers (1-6) forming super-enhancers in vehicle (veh) and lipopolysaccharide (LPS) treated bone marrow-derived macrophages (BMDMs).

**(K-L)** RAR tag densities of mother (M) and the top 6 daughter enhancers (1-6) forming super-enhancers in vehicle (veh) and all-trans retinoic acid (ATRA) treated F9 cells.

**(M-N)** VDR tag densities of mother (M) and the top 6 daughter enhancers (1-6) forming super-enhancers in vehicle (veh) and cholecalciferol (D3) treated mouse intestinal epithelial cells.

Enhancers were vertically sorted based on the RPKM values of the mother enhancers (in the first row), and the individual enhancers within a SE region were subsequently horizontally aligned based on read enrichment in the vehicle-treated samples.

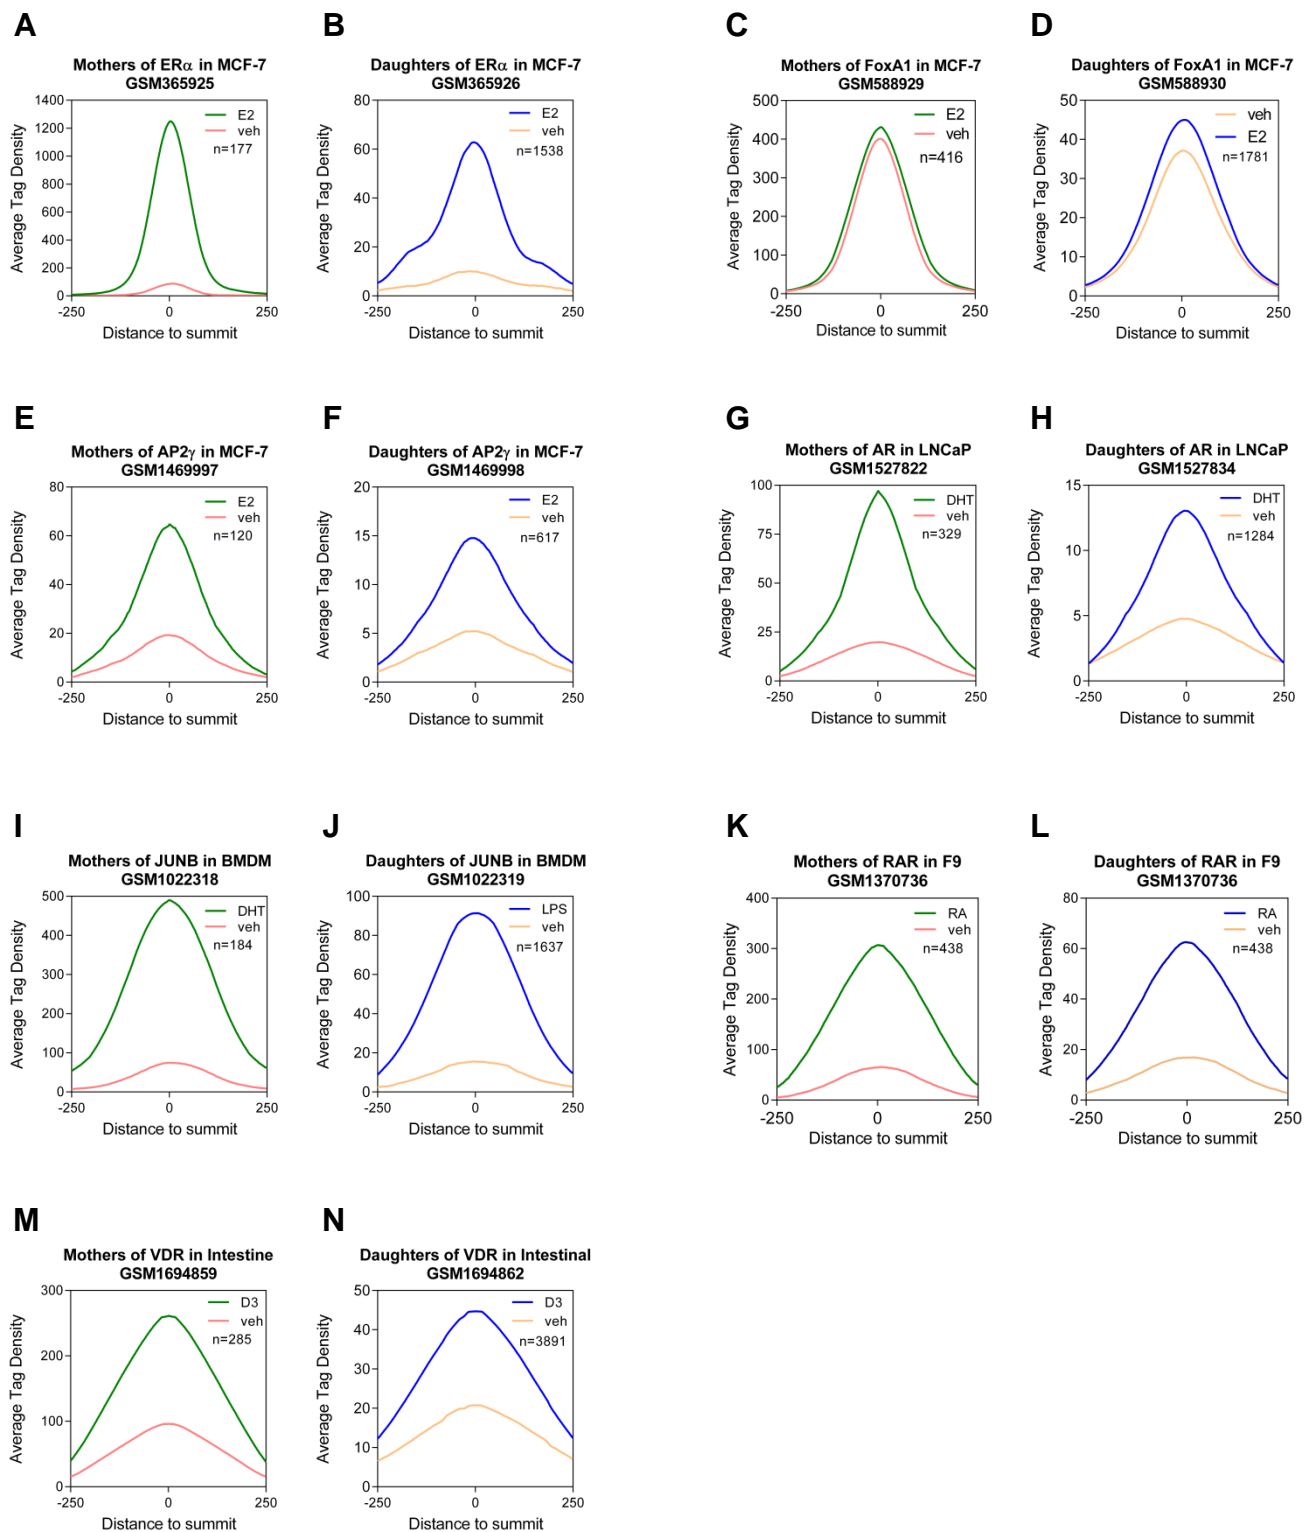

**Figure S3. Mother enhancers show larger tag density before treatment than the daughter enhancers upon treatment.**

Histograms show the average tag density of ER $\alpha$  (A-B), FoxA1 (C-D) and AP2 $\gamma$  (E-F) mother and daughter enhancers in vehicle (veh) and estradiol (E2) treated MCF-7 cells; (G-H) AR mother and daughter peaks in vehicle (veh) and dihydrotestosterone (DHT) treated LNCaP cells; (I-J) JUNB mother and daughter peaks in vehicle (veh) and lipopolysaccharide (LPS) treated bone marrow-derived macrophages (BMDMs); (K-L) RAR mother and daughter peaks in vehicle (veh) and all-trans retinoic acid (ATRA) treated F9 cells; (M-N) VDR mother and daughter peaks in vehicle (veh) and cholecalciferol (D3) treated mouse intestinal epithelial cells.

**Figure S4.**

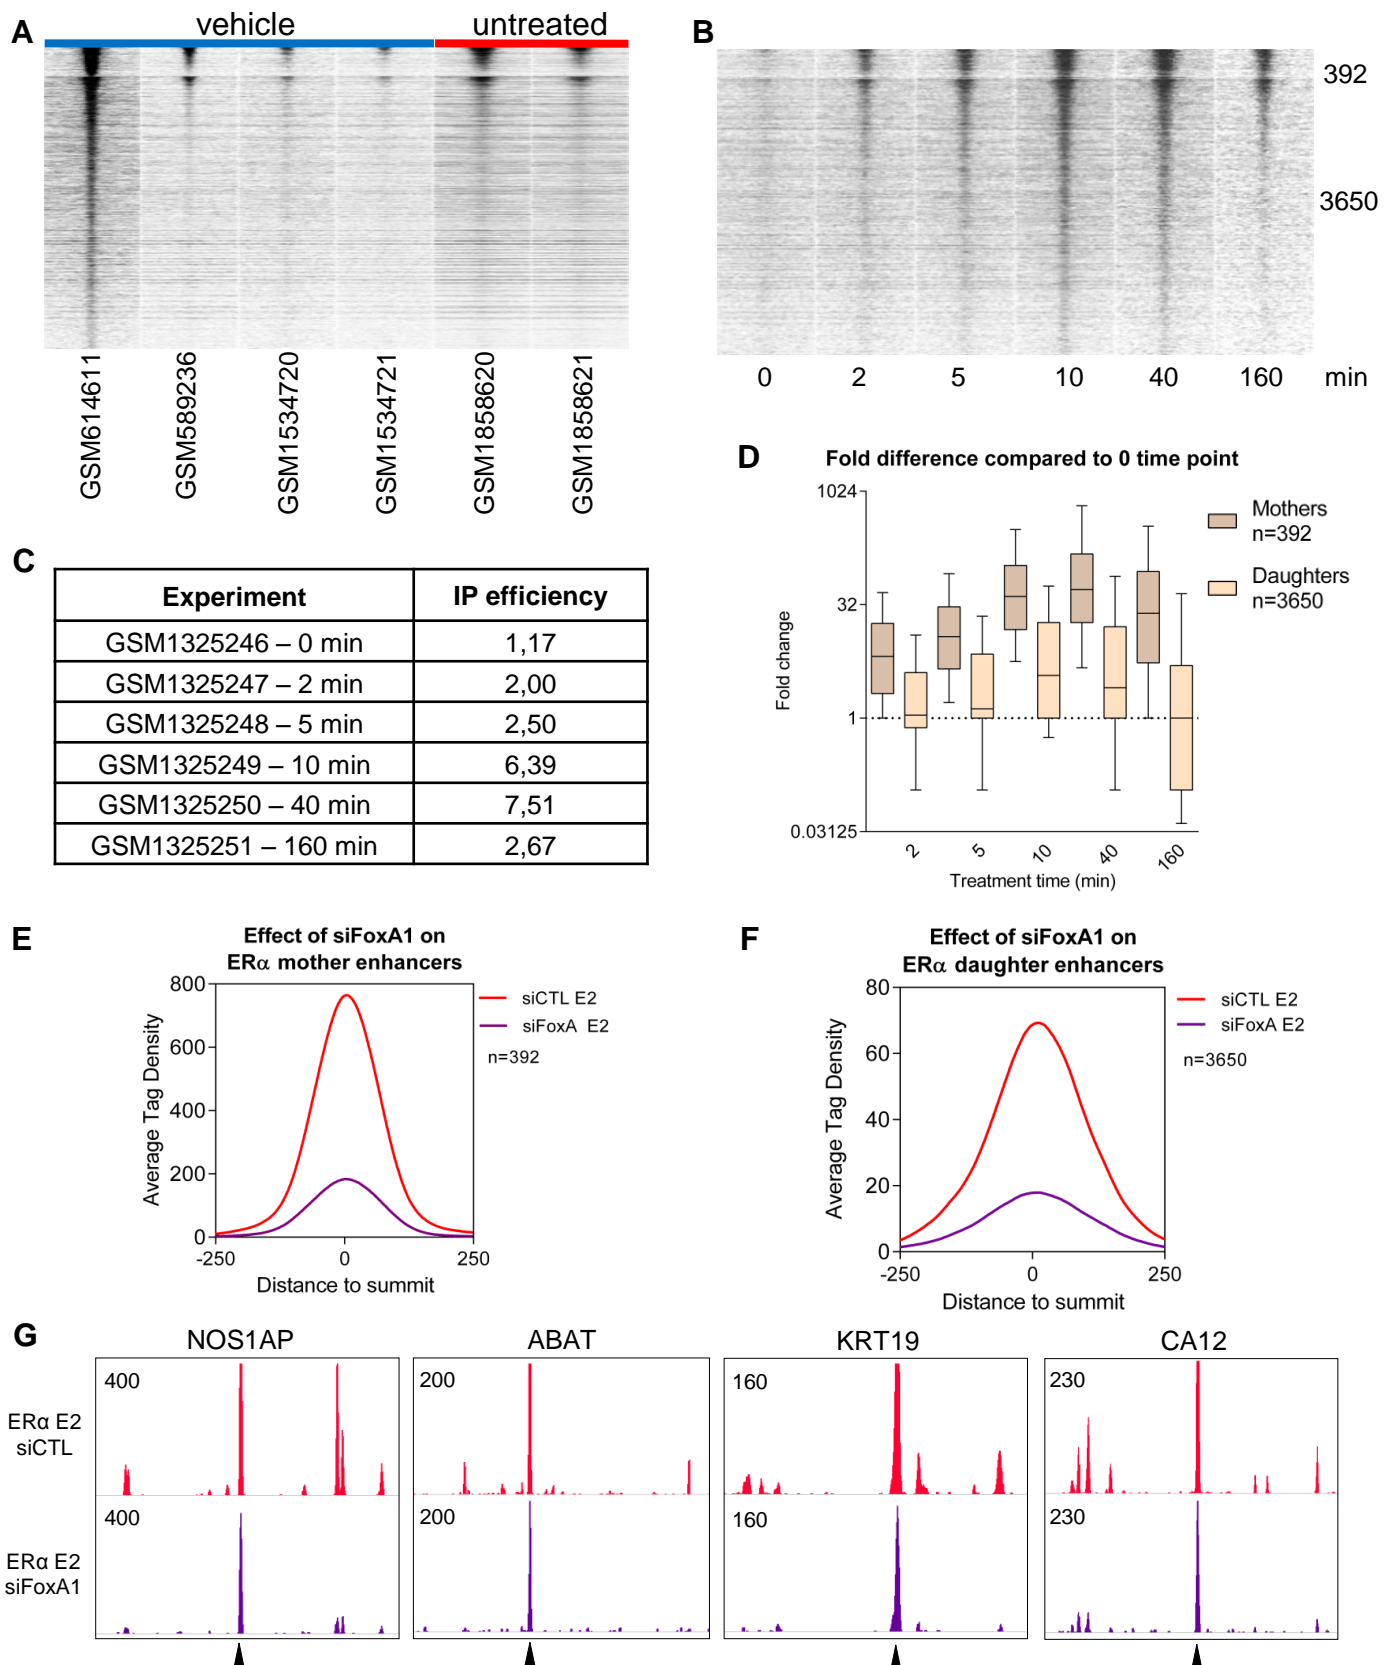

**Figure S4. SE formation depends on nucleating (mother) enhancers and the presence of FoxA1.**

(A) Read distribution plots of ER $\alpha$  mother (392) and daughter (3650) enhancers upon vehicle treatment or without any treatment (untreated), and (B) upon E2-treatment in different time points (0, 2, 5, 10, 40, 160 min) relative to ER $\alpha$ -bound SE peaks in 2 kb frames. (C) Calculated IP-efficiency of the used samples. (D) Box plot represent fold differences of ER $\alpha$  enhancers compared to the 0 time point. Histograms show the average tag density of ER $\alpha$  (E) mother and (F) daughter enhancers derived from E2-treated siCTL and siFoxA1 ChIP-seq experiments. (G) IGV snapshot of ER $\alpha$  ChIP-seq coverage, representing four E2-treated ER $\alpha$  SEs before (siCTL) and after the silencing of FoxA1 (siFoxA1).

Figure S5.

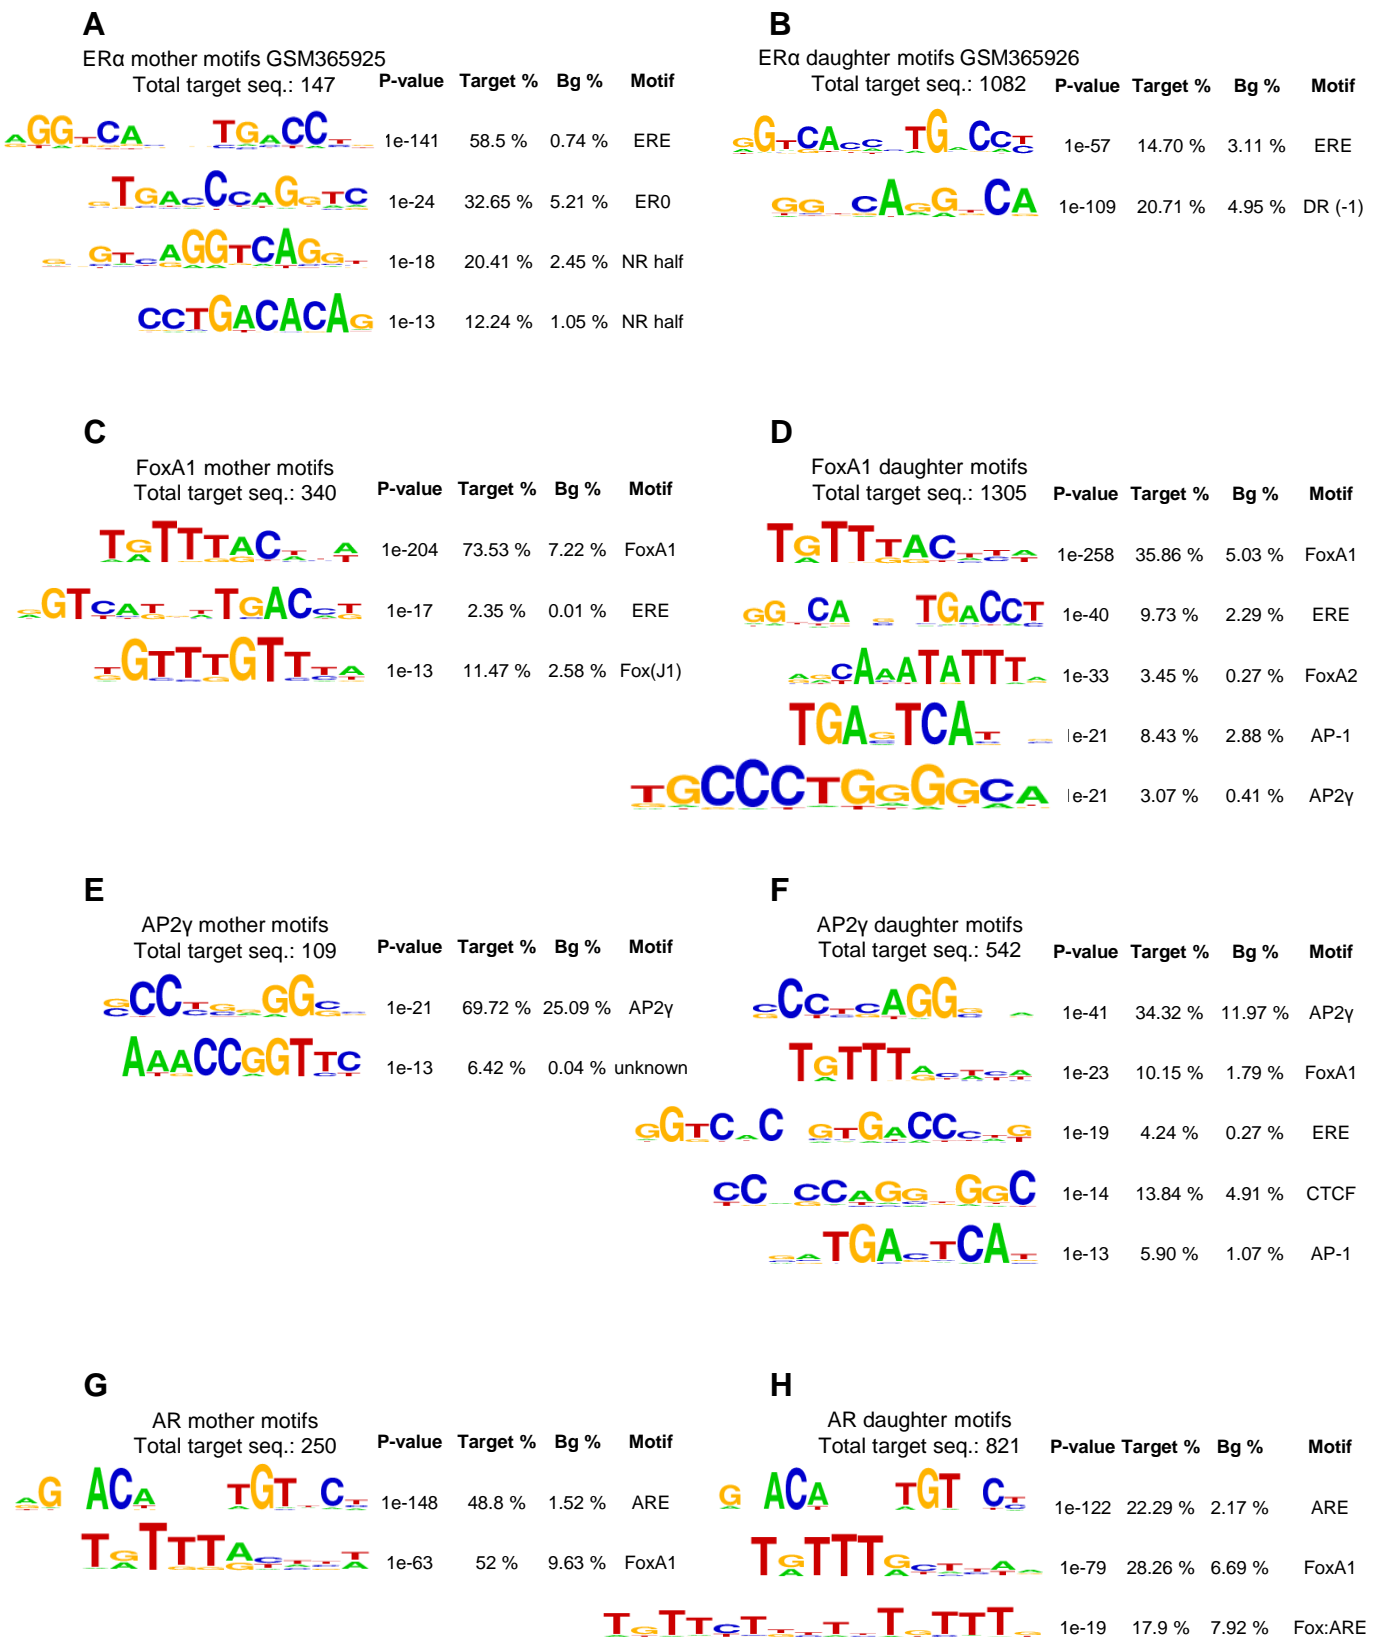

Figure S5. Canonical elements provide higher DNA-binding affinity than non-canonical elements.

Motif enrichment analysis under the mother and daughter enhancers of ERα (A-B), FoxA1 (C-D), AP2γ (E-F) and AR (G-H). The P-value and target and background (Bg) percentages are included for each motif.



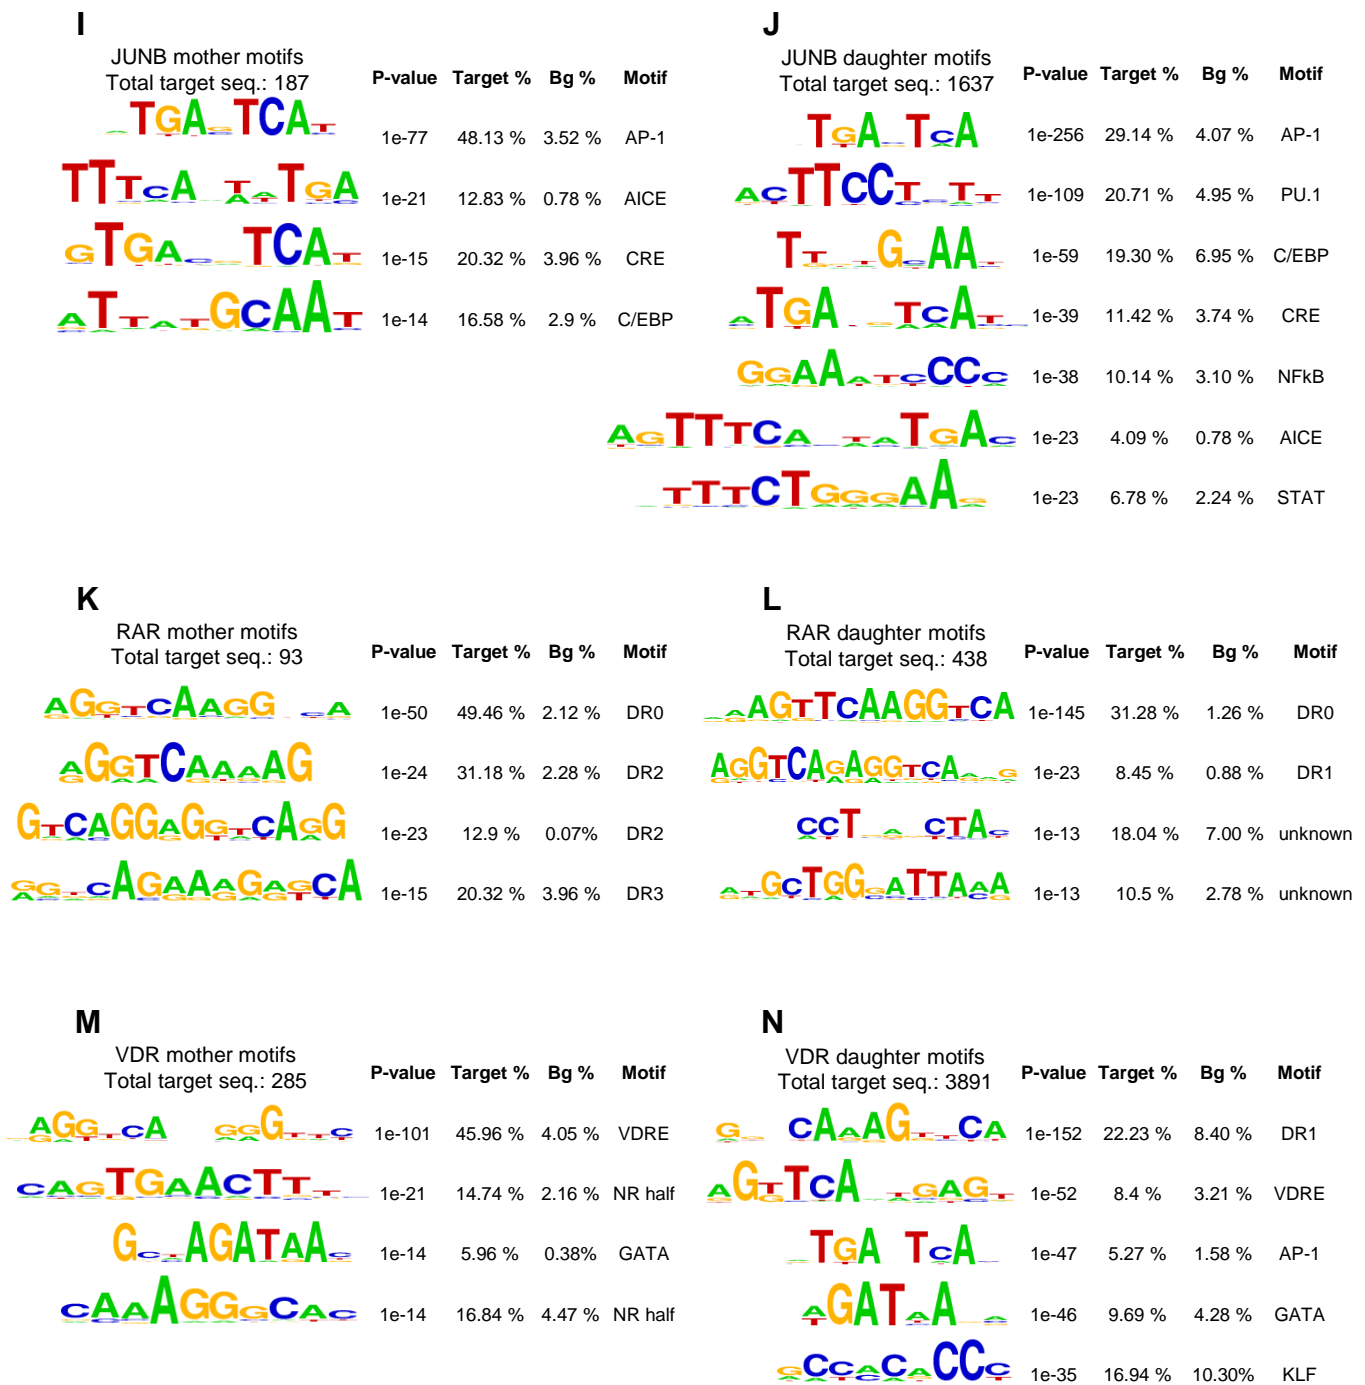

**Figure S5. Canonical elements provide higher DNA-binding affinity than non-canonical elements.**

Motif enrichment analysis under the mother and daughter enhancers of JUNB (I-J), RAR (K-L) and VDR (M-N). The P-value and target and background (Bg) percentages are included for each motif.



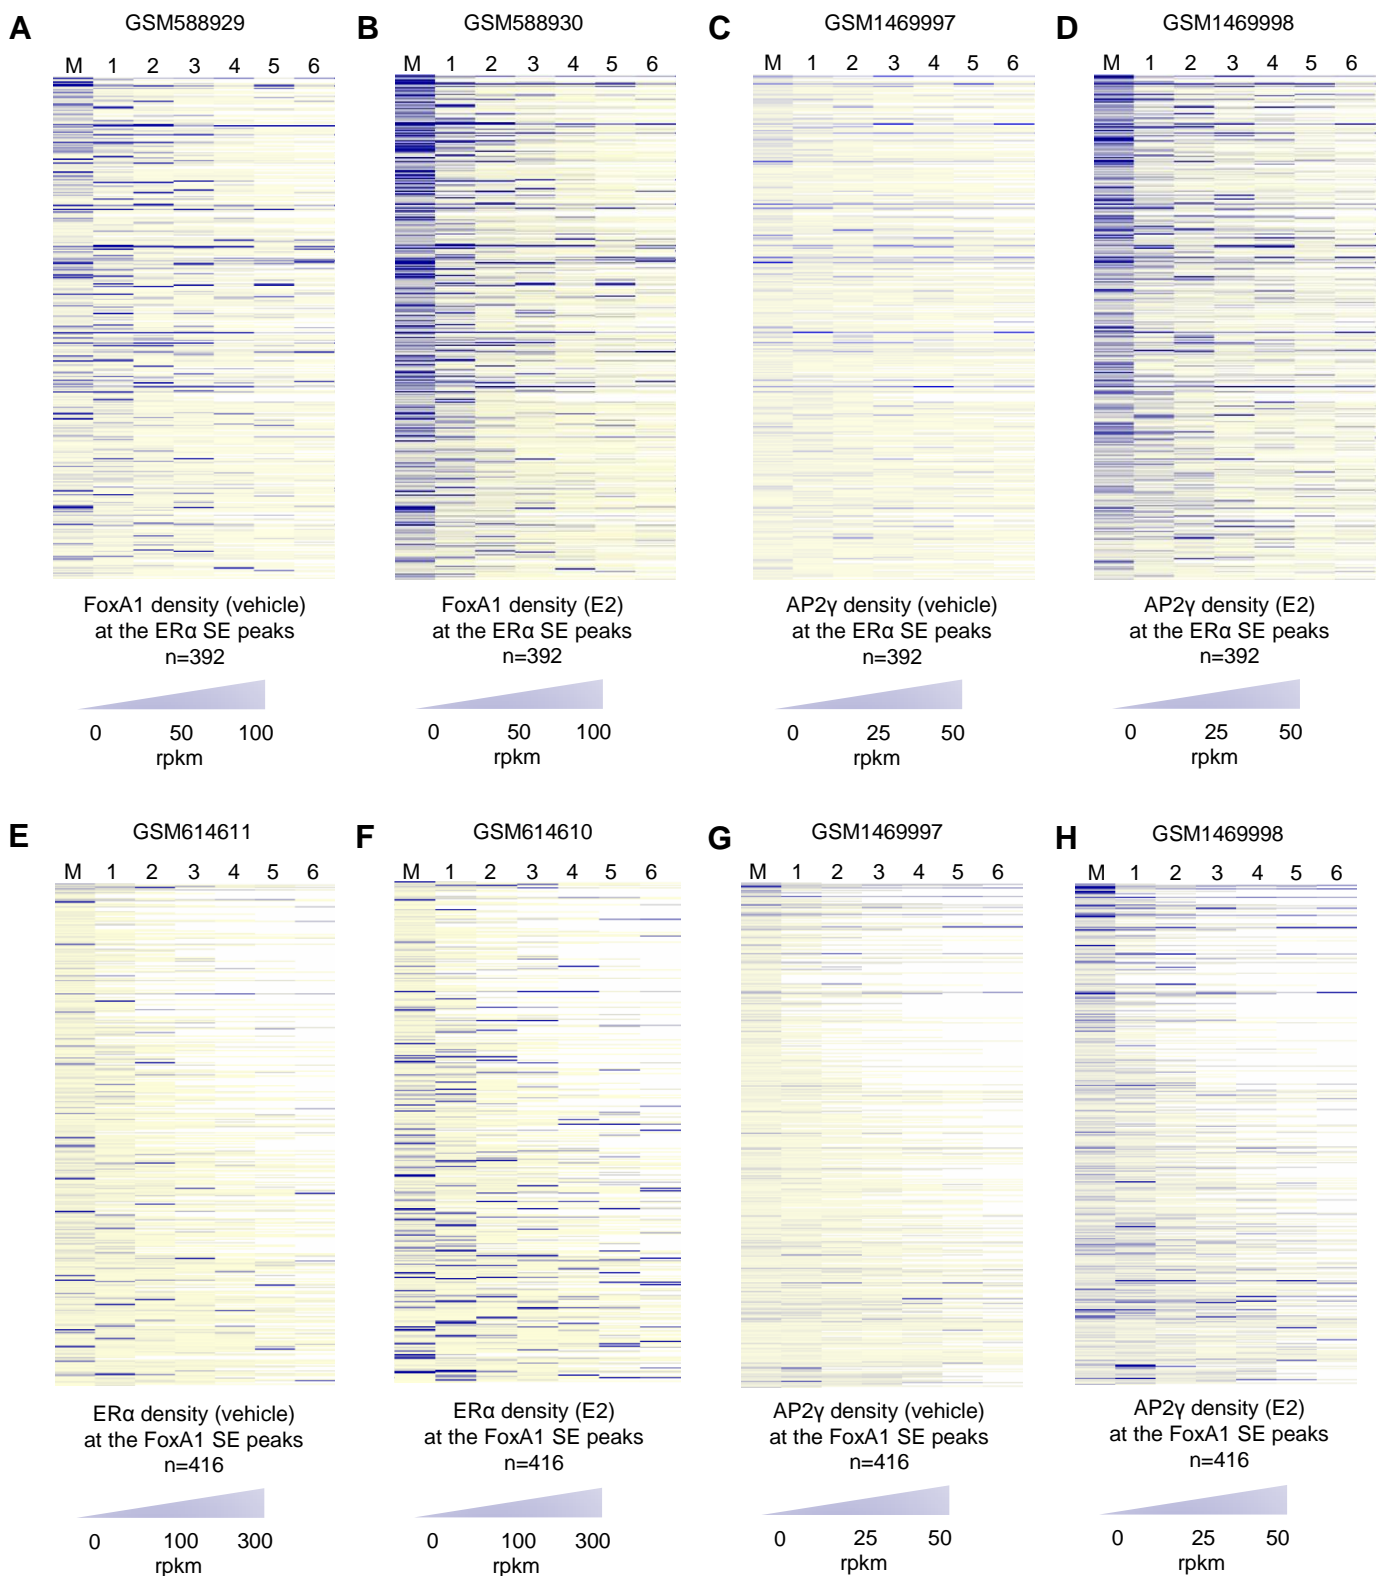

**Figure S6. Recruitment of ER $\alpha$ , FoxA1 and AP2 $\gamma$  at each other's SEs.**

Heatmaps represent the FoxA1 (A-B) and AP2 $\gamma$  (C-D) density at the ER $\alpha$  mother (M) and the top 6 daughter enhancers (1-6) forming super-enhancers in vehicle (veh) and estradiol (E2) treated MCF-7 cells.

ER $\alpha$  (E-F) and AP2 $\gamma$  (G-H) density at the FoxA1 mother (M) and the top 6 daughter enhancers (1-6) forming super-enhancers in vehicle (veh) and estradiol (E2) treated MCF-7 cells.

Enhancers were vertically sorted based on the RPKM values of the mother enhancers (in the first row), and the individual enhancers within a SE region were subsequently horizontally aligned based on read enrichment in the vehicle-treated samples.

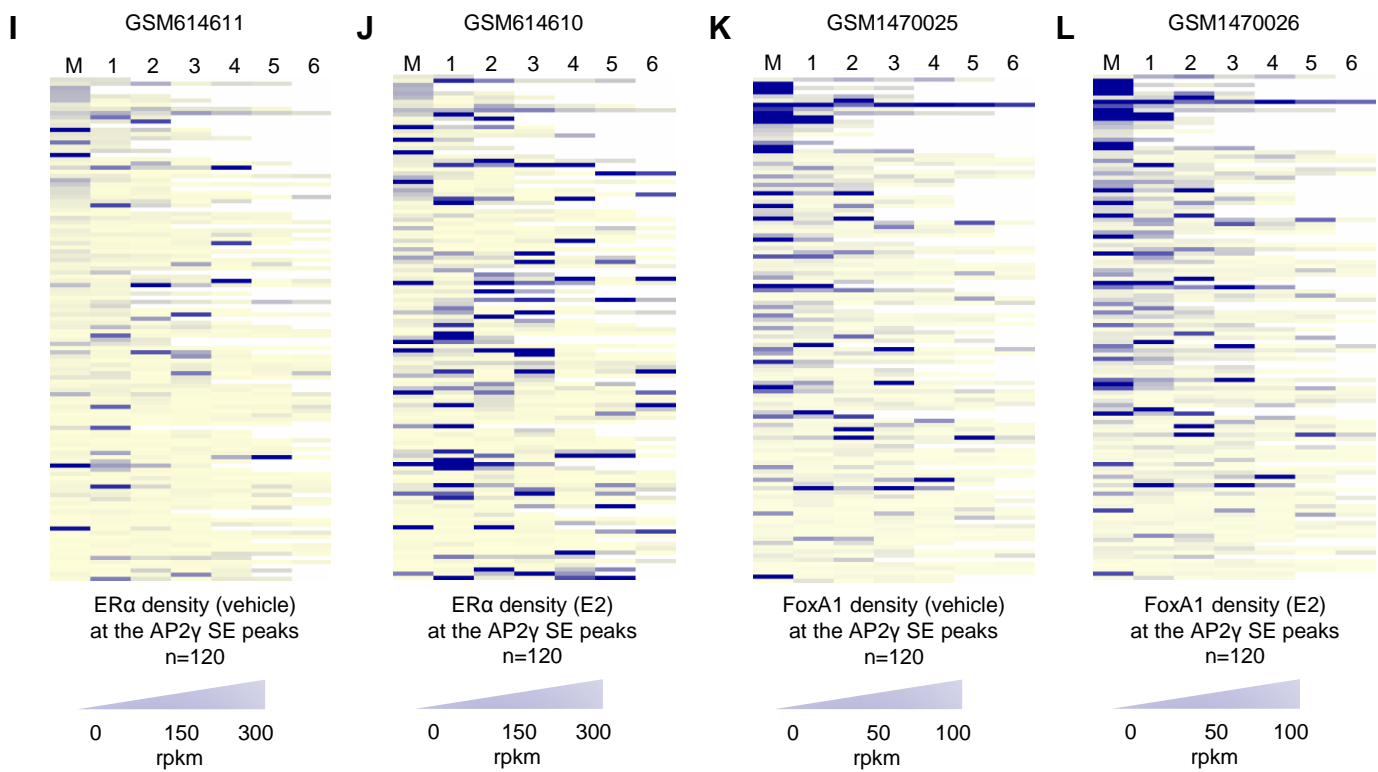

**Figure S6. Recruitment of ERα, FoxA1 and AP2γ at each other's SEs.**

Heatmaps represent the ERα (**I-J**) and FoxA1 (**K-L**) density at the AP2γ mother (M) and the top 6 daughter enhancers (1-6) forming super-enhancers in vehicle (veh) and estradiol (E2) treated MCF-7 cells.

Enhancers were vertically sorted based on the RPKM values of the mother enhancers (in the first row), and the individual enhancers within a SE region were subsequently horizontally aligned based on read enrichment in the vehicle-treated samples.

**A**

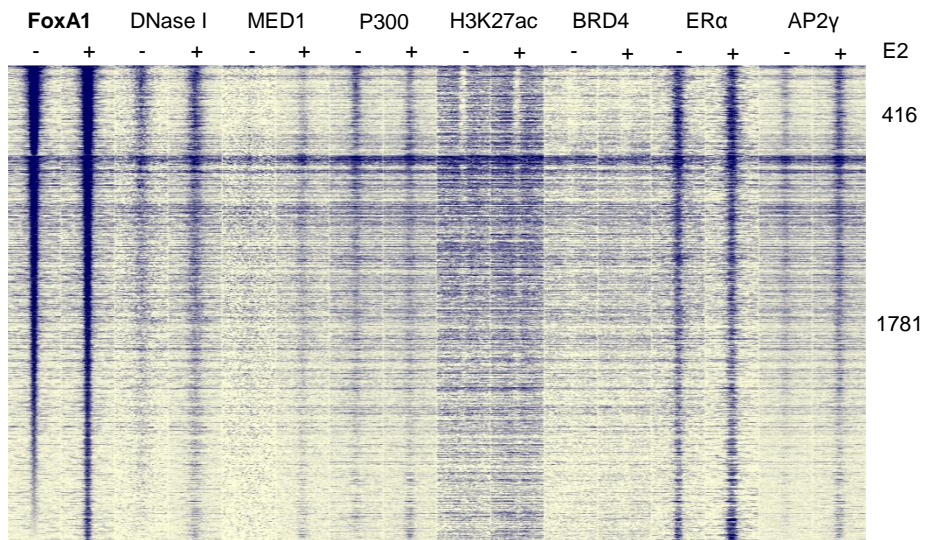

**B**

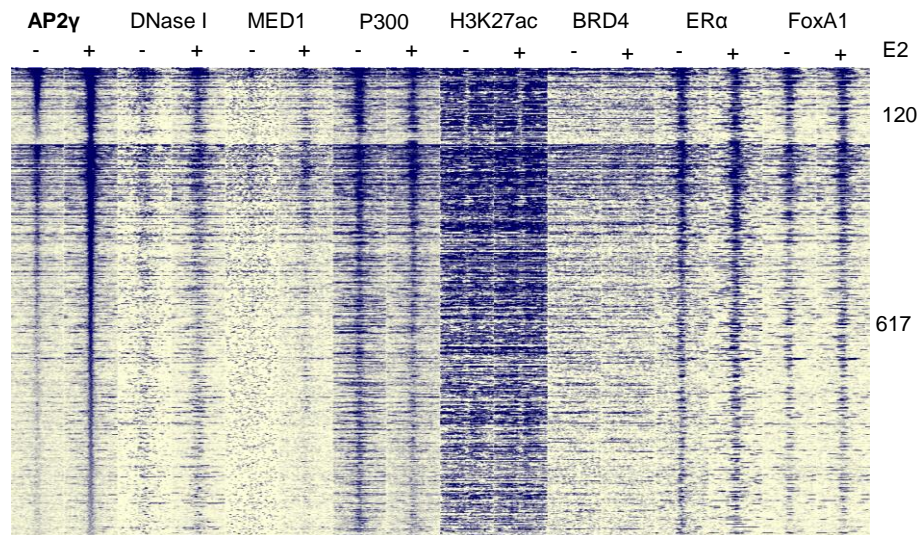

**Figure S7. FoxA1 and AP2γ super-enhancers show active but not inducible presence of active marks and co-factors upon E2 treatment.**

Read distribution plot of DNase I, MED1, P300, H3K27ac, BRD4, ERα and AP2γ or FoxA1 upon vehicle or E2 treatment, relative to FoxA1 **(A)** or AP2γ **(B)** SE peaks in 2 kb frames. The number of mother and daughter peaks, which are sorted according to FoxA1 **(A)** or AP2γ **(B)** tag density.

| Transcription factor | Cell line  | Treatment | Organism | GEO ID (vehicle) | GEO ID (treated) | Reference |
|----------------------|------------|-----------|----------|------------------|------------------|-----------|
| ER $\alpha$          | MCF-7      | E2        | human    | GSM614611        | GSM614610        | (1)       |
| ER $\alpha$          | MCF-7      | E2        | human    | GSM365925        | GSM365926        | (2)       |
| FoxA1                | MCF-7      | E2        | human    | GSM588929        | GSM588930        | (3)       |
| AP2 $\gamma$         | MCF-7      | E2        | human    | GSM1469997       | GSM1469998       | (4)       |
| AR                   | LNCaP      | DHT       | human    | GSM1527822       | GSM1527834       | (5)       |
| JUNB                 | BMDM       | LPS       | mouse    | GSM1022318       | GSM1022319       | (6)       |
| RAR                  | F9         | RA        | mouse    | GSM1370730       | GSM1370736       | (7)       |
| VDR                  | Intestinal | D3        | mouse    | GSM1694859       | GSM1694862       | (8)       |

**Table S1. Table of used transcription factor ChIP-seq samples.**

Table contains informations about transcription factor ChIP-seq samples that have been used to the basic analyses to determine mother-daughter phenomenon. Columns represent the examined transcription factors, the cell line in which the interested TF/binding events was/were investigated, type of the treatment and organism, Gene Expression Omnibus (GEO) IDs of the samples before (vehicle) and after the treatment (treated).

| GEO ID     | E2 treatment   | MACS2 peaks<br>w/o artifacts | Predicted<br>SEs | Peaks within<br>SEs | Overlapping SEs<br>with consensus | Reference |
|------------|----------------|------------------------------|------------------|---------------------|-----------------------------------|-----------|
| GSM614610  | 100 nM, 45 min | 74 697                       | 392              | 4 042               | 379 (96.6 %)                      | (1)       |
| GSM365926  | 10 nM, 1 hr    | 82 777                       | 270              | 1124                | 269 (99.6 %)                      | (2)       |
| GSM1187116 | 10 nM, 45 min  | 46 423                       | 342              | 1251                | 311 (90.9%)                       | (9)       |
| GSM1187117 | 10 nM, 45 min  | 41 164                       | 483              | 1834                | 455 (94.2 %)                      |           |
| GSM1187118 | 10 nM, 45 min  | 33 306                       | 418              | 1394                | 393 (94 %)                        |           |
| GSM1115990 | 100 nM, 1 hr   | 31 964                       | 186              | 761                 | 179 (96.2%)                       | (10)      |
| GSM589237  | 100 nM, 45 min | 13 052                       | 152              | 480                 | 151 (99.3 %)                      | (11)      |
| GSM470419  | 10 nM, 45 min  | 28 936                       | 208              | 586                 | 203 (97.6%)                       | (12)      |

**Table S2. Estradiol-treated (E2) ER $\alpha$  CHIP-seq samples used for the comparative analysis.**

Table contains the Gene expression Omnibus (GEO) IDs of eight publicly available ER $\alpha$  CHIP-seq samples derived from MCF-7 cell line; further the circumstances of E2-treatment; number of the predicted MACS2 peaks, from which the blacklisted genomic regions collected by ENCODE were removed; number of the predictable super-enhancers (SEs); number of the peaks within SEs and a percent value about how many SEs overlap with at least one peak(s) of the 4,387 consensus ER $\alpha$  binding sites.

**Table S3.**

| (Transcription) factor    | Cell line | Organism | GEO ID (vehicle) | GEO ID (E2 treated) | GEO ID (untreated) | GEO ID (tam/fulv) | Reference |
|---------------------------|-----------|----------|------------------|---------------------|--------------------|-------------------|-----------|
| MED1                      | MCF-7     | human    | GSM1469999       | GSM1470000          | -                  | -                 | (4)       |
| P300                      | MCF-7     | human    | GSM1470013       | GSM1470014          | -                  | -                 | (4)       |
| DNase I                   | MCF-7     | human    | GSM822389        | GSM822390           | -                  | -                 | (13)      |
| H3K27ac                   | MCF-7     | human    | GSM1382472       | GSM1382482          | -                  | -                 | (14)      |
| BRD4                      | MCF-7     | human    | GSM1348516       | GSM1348519          | -                  | -                 | (4)       |
| ER $\alpha$               | MCF-7     | human    | GSM589236        | -                   | -                  | -                 | (11)      |
| ER $\alpha$               | MCF-7     | human    | GSM1534720       | -                   | -                  | -                 | (15)      |
| ER $\alpha$               | MCF-7     | human    | GSM1534721       | -                   | -                  | -                 |           |
| ER $\alpha$               | MCF-7     | human    | -                | -                   | GSM1858620         | -                 | (16)      |
| ER $\alpha$               | MCF-7     | human    | -                | -                   | GSM1858621         | -                 |           |
| ER $\alpha$ (0 min)       | MCF-7     | human    | -                | -                   | GSM1325246         | -                 | (17)      |
| ER $\alpha$ (2 min)       | MCF-7     | human    | -                | GSM1325247          | -                  | -                 |           |
| ER $\alpha$ (5 min)       | MCF-7     | human    | -                | GSM1325248          | -                  | -                 |           |
| ER $\alpha$ (10 min)      | MCF-7     | human    | -                | GSM1325249          | -                  | -                 |           |
| ER $\alpha$ (40 min)      | MCF-7     | human    | -                | GSM1325250          | -                  | -                 |           |
| ER $\alpha$ (160 min)     | MCF-7     | human    | -                | GSM1325251          | -                  | -                 |           |
| ER $\alpha$ (siFoxA1)     | MCF-7     | human    | GSM631465        | -                   | -                  | -                 | (18)      |
| ER $\alpha$ (siFoxA1)     | MCF-7     | human    | -                | GSM631467           | -                  | --                |           |
| ER $\alpha$ (tam/fulv)    | MCF-7     | human    | GSM365925        | -                   | -                  | -                 | (2)       |
| ER $\alpha$ (tam/fulv)    | MCF-7     | human    | -                | GSM365926           | -                  | -                 |           |
| ER $\alpha$ (tamoxifen)   | MCF-7     | human    | -                | -                   | -                  | GSM365927         |           |
| ER $\alpha$ (fulvestrant) | MCF-7     | human    | -                | -                   | -                  | GSM365928         |           |

**Table S3. Table of used ChIP-seq samples to characterize super-enhancers.**

Table contains informations about ChIP-seq samples that have been used to the characterization of enhancers. Columns represent the examined factors, the cell line and organism in which the interested events were investigated, Gene Expression Omnibus (GEO) IDs, treatment type of ChIP-seq samples (vehicle, E2, untreated, tamoxifen or fulvestrant) and the related references.

1. Schmidt,D., Schwalie,P.C., Ross-Innes,C.S., Hurtado,A., Brown,G.D., Carroll,J.S., Flicek,P. and Odom,D.T. (2010) A CTCF-independent role for cohesin in tissue-specific transcription. *Genome Res.*, **20**, 578–88.
2. Welboren,W.-J., van Driel,M.A., Janssen-Megens,E.M., van Heeringen,S.J., Sweep,F.C., Span,P.N. and Stunnenberg,H.G. (2009) ChIP-Seq of ERalpha and RNA polymerase II defines genes differentially responding to ligands. *EMBO J.*, **28**, 1418–28.
3. Tan,S.K., Lin,Z.H., Chang,C.W., Varang,V., Chng,K.R., Pan,Y.F., Yong,E.L., Sung,W.K., Sung,W.K. and Cheung,E. (2011) AP-2γ regulates oestrogen receptor-mediated long-range chromatin interaction and gene transcription. *EMBO J.*, **30**, 2569–81.
4. Liu,Z., Merkurjev,D., Yang,F., Li,W., Oh,S., Friedman,M.J., Song,X., Zhang,F., Ma,Q., Ohgi,K.A., *et al.* (2014) Enhancer Activation Requires trans-Recruitment of a Mega Transcription Factor Complex. *Cell*, **159**, 358–373.
5. Takayama,K., Suzuki,T., Tsutsumi,S., Fujimura,T., Urano,T., Takahashi,S., Homma,Y., Aburatani,H. and Inoue,S. (2015) RUNX1, an androgen- and EZH2-regulated gene, has differential roles in AR-dependent and -independent prostate cancer. *Oncotarget*, **6**, 2263–76.
6. Ostuni,R., Piccolo,V., Barozzi,I., Polletti,S., Termanini,A., Bonifacio,S., Curina,A., Prosperini,E., Ghisletti,S. and Natoli,G. (2013) Latent Enhancers Activated by Stimulation in Differentiated Cells. *Cell*, **152**, 157–171.
7. Chatagnon,A., Veber,P., Morin,V., Bedo,J., Triqueneaux,G., Sémon,M., Laudet,V., d'Alché-Buc,F. and Benoit,G. (2015) RAR/RXR binding dynamics distinguish pluripotency from differentiation associated cis-regulatory elements. *Nucleic Acids Res.*, **43**, 4833–54
8. Lee,S.M., Riley,E.M., Meyer,M.B., Benkusky,N.A., Plum,L.A., DeLuca,H.F. and Pike,J.W. (2015) 1,25-Dihydroxyvitamin D3 Controls a Cohort of Vitamin D Receptor Target Genes in the Proximal Intestine That Is Enriched for Calcium-regulating Components. *J. Biol. Chem.*, **290**, 18199–215.
9. Fletcher,M.N.C., Castro,M.A.A., Wang,X., de Santiago,I., O'Reilly,M., Chin,S.-F., Rueda,O.M., Caldas,C., Ponder,B.A.J., Markowitz,F., *et al.* (2013) Master regulators of FGFR2 signalling and breast cancer risk. *Nat. Commun.*, **4**, 2464.
10. Li,W., Notani,D., Ma,Q., Tanasa,B., Nunez,E., Chen,A.Y., Merkurjev,D., Zhang,J., Ohgi,K., Song,X., *et al.* (2013) Functional roles of enhancer RNAs for oestrogen-dependent transcriptional activation. *Nature*, **498**, 516–20.
11. Joseph,R., Orlov,Y.L., Huss,M., Sun,W., Kong,S.L., Ukil,L., Pan,Y.F., Li,G., Lim,M., Thomsen,J.S., *et al.* (2010) Integrative model of genomic factors for determining binding site selection by estrogen receptor-α. *Mol. Syst. Biol.*, **6**, 456.
12. Hu,M., Yu,J., Taylor,J.M.G., Chinnaiyan,A.M. and Qin,Z.S. (2010) On the detection and refinement of transcription factor binding sites using ChIP-Seq data. *Nucleic Acids Res.*, **38**, 2154–67.
13. He,H.H., Meyer,C.A., Chen,M.W., Jordan,V.C., Brown,M. and Liu,X.S. (2012) Differential DNase I hypersensitivity reveals factor-dependent chromatin dynamics. *Genome Res.*, **22**, 1015–25.
14. Brunelle,M., Nordell Markovits,A., Rodrigue,S., Lupien,M., Jacques,P.-É. and Gévry,N. (2015) The histone variant H2A.Z is an important regulator of enhancer activity. *Nucleic Acids Res.*, **43**, 9742–56.



15. Franco,H.L., Nagari,A. and Kraus,W.L. (2015) TNF $\alpha$  signaling exposes latent estrogen receptor binding sites to alter the breast cancer cell transcriptome. *Mol. Cell*, **58**, 21–34.
16. Swinstead,E.E., Miranda,T.B., Paakinaho,V., Baek,S., Goldstein,I., Hawkins,M., Karpova,T.S., Ball,D., Mazza,D., Lavis,L.D., *et al.* (2016) Steroid Receptors Reprogram FoxA1 Occupancy through Dynamic Chromatin Transitions. *Cell*, **165**, 593–605.
17. Guertin,M.J., Zhang,X., Coonrod,S.A. and Hager,G.L. (2014) Transient estrogen receptor binding and p300 redistribution support a squelching mechanism for estradiol-repressed genes. *Mol. Endocrinol.*, **28**, 1522–33.
18. Hurtado,A., Holmes,K.A., Ross-Innes,C.S., Schmidt,D. and Carroll,J.S. (2011) FOXA1 is a key determinant of estrogen receptor function and endocrine response. *Nat. Genet.*, **43**, 27–33.
